# Supplementary material for: A Zero-Dimensional Organic Lead Bromide of (TPA)2PbBr4 Single Crystal with Bright Blue Emission
Source: MDPI journal article supplement (doi:10.3390/nano12132222), 2022-06-28
Supplement: s1 [file s1]

## Supplementary Materials

# A Zero-Dimensional Organic Lead Bromide of (TPA)<sub>2</sub>PbBr<sub>4</sub> Single Crystal with Bright Blue Emission

Ye Tian <sup>1,2,†</sup>, Qilin Wei <sup>2,†</sup>, Hui Peng <sup>1,2,\*</sup>, Zongmian Yu <sup>2</sup>, Shangfei Yao <sup>2</sup>, Bao Ke <sup>2</sup>, Qiuyan Li <sup>2</sup> and Bingsuo Zou <sup>2,\*</sup>

<sup>1</sup> Beijing Key Laboratory of Nanophotonics & Ultrafine Optoelectronic Systems, Beijing Institute of Technology, Beijing 100081, China; tianye080t@163.com

<sup>2</sup> Guangxi Key Lab of Processing for Nonferrous Metals and Featured Materials and Key Lab of New Processing Technology for Nonferrous Metals and Materials, Ministry of Education; School of Resources, Environments and Materials, Guangxi University, Nanning 530004, China; qlwei@st.gxu.edu.cn (Q.W.); yzmmaterials@163.com (Z.Y.); yaoshangfei@st.gxu.edu.cn (S.Y.); abnerkeb@163.com (B.K.); liqiuyan63@163.com (Q.L.)

\* Correspondence: penghuimaterial@163.com (H.P.); zoubs@gxu.edu.cn (B.Z.)

† These authors contributed equally to this work.

**Table S1.** Crystal data and structure refinement for (TPA)<sub>2</sub>PbBr<sub>4</sub> single crystal.

| Empirical formula                           | C <sub>24</sub> H <sub>56</sub> Br <sub>4</sub> N <sub>2</sub> Pb |
|---------------------------------------------|-------------------------------------------------------------------|
| Formula weight                              | 899.53                                                            |
| Temperature/K                               | 297.7(5)                                                          |
| Crystal system                              | monoclinic                                                        |
| Space group                                 | I2/a                                                              |
| a/Å                                         | 14.9268(6)                                                        |
| b/Å                                         | 14.5097(6)                                                        |
| c/Å                                         | 31.9309(11)                                                       |
| α/°                                         | 90                                                                |
| β/°                                         | 94.414(4)                                                         |
| γ/°                                         | 90                                                                |
| Volume/Å <sup>3</sup>                       | 6895.2(5)                                                         |
| Z                                           | 8                                                                 |
| ρ <sub>calc</sub> /cm <sup>3</sup>          | 1.733                                                             |
| μ/mm <sup>-1</sup>                          | 9.543                                                             |
| F(000)                                      | 3488.0                                                            |
| Crystal size/mm <sup>3</sup>                | 0.21 × 0.19 × 0.16                                                |
| Radiation                                   | MoKα (λ = 0.71073)                                                |
| 2θ range for data collection/°              | 3.084 to 61.798                                                   |
| Index ranges                                | -15 ≤ h ≤ 21, -15 ≤ k ≤ 20, -42 ≤ l ≤ 45                          |
| Reflections collected                       | 26996                                                             |
| Independent reflections                     | 9297 [R <sub>int</sub> = 0.0417, R <sub>sigma</sub> = 0.0697]     |
| Data/restraints/parameters                  | 9297/379/399                                                      |
| Goodness-of-fit on F <sup>2</sup>           | 1.005                                                             |
| Final R indexes [I >= 2σ (I)]               | R <sub>1</sub> = 0.0478, wR <sub>2</sub> = 0.0960                 |
| Final R indexes [all data]                  | R <sub>1</sub> = 0.1323, wR <sub>2</sub> = 0.1138                 |
| Largest diff. peak/hole / e Å <sup>-3</sup> | 1.22/-1.23                                                        |
| Flack parameter                             | -0.07(7)                                                          |

**Table S2.** Bond lengths for (TPA)<sub>2</sub>PbBr<sub>4</sub> single crystal.

| Atom | Atom             | Length/Å   | Atom | Atom              | Length/Å  |
|------|------------------|------------|------|-------------------|-----------|
| Pb1  | Br1              | 3.0042(8)  | N2   | C16               | 1.510(6)  |
| Pb1  | Br2              | 2.8773(8)  | N2   | C16 <sup>1</sup>  | 1.511(6)  |
| Pb1  | Br3              | 2.7948(10) | C13  | C14               | 1.500(8)  |
| Pb1  | Br4              | 2.7241(7)  | C14  | C15               | 1.502(8)  |
| N1   | C1               | 1.515(9)   | C16  | C17               | 1.515(8)  |
| N1   | C4               | 1.491(7)   | C17  | C18               | 1.518(9)  |
| N1   | C7               | 1.543(10)  | N3   | C19               | 1.620(13) |
| N1   | C10              | 1.511(9)   | N3   | C19 <sup>2</sup>  | 1.620(13) |
| N1   | C4A              | 1.518(10)  | N3   | C22               | 1.515(13) |
| N1   | C1A              | 1.56(2)    | N3   | C22 <sup>2</sup>  | 1.515(13) |
| N1   | C7A              | 1.48(3)    | N3   | C19A              | 1.432(16) |
| N1   | C10A             | 1.53(3)    | N3   | C19A <sup>2</sup> | 1.432(16) |
| C1   | C2               | 1.548(14)  | N3   | C22A <sup>2</sup> | 1.603(14) |
| C2   | C3               | 1.479(11)  | N3   | C22A              | 1.603(14) |
| C3   | C2A              | 1.52(3)    | C19  | C20               | 1.477(9)  |
| C4   | C5               | 1.526(8)   | C20  | C21               | 1.549(8)  |
| C5   | C6               | 1.538(8)   | C21  | C20A              | 1.536(9)  |
| C6   | C5A              | 1.526(9)   | C22  | C23               | 1.534(9)  |
| C7   | C8               | 1.476(15)  | C23  | C24               | 1.495(8)  |
| C8   | C9               | 1.525(11)  | C24  | C23A              | 1.550(9)  |
| C9   | C8A              | 1.63(3)    | C4A  | C5A               | 1.537(10) |
| C10  | C11              | 1.492(12)  | C1A  | C2A               | 1.42(4)   |
| C11  | C12              | 1.518(11)  | C7A  | C8A               | 1.52(4)   |
| C12  | C11A             | 1.532(10)  | C10A | C11A              | 1.534(10) |
| N2   | C13 <sup>1</sup> | 1.520(6)   | C19A | C20A              | 1.530(9)  |
| N2   | C13              | 1.520(6)   | C23A | C22A              | 1.477(9)  |

**Table S3.** Bond angles for (TPA)<sub>2</sub>PbBr<sub>4</sub> single crystal.

| Atom             | Atom | Atom             | Angle/°   | Atom              | Atom | Atom              | Angle/°   |
|------------------|------|------------------|-----------|-------------------|------|-------------------|-----------|
| Br2              | Pb1  | Br1              | 126.18(3) | C14               | C13  | N2                | 116.5(5)  |
| Br3              | Pb1  | Br1              | 119.28(3) | C13               | C14  | C15               | 109.9(6)  |
| Br3              | Pb1  | Br2              | 105.02(3) | N2                | C16  | C17               | 115.7(5)  |
| Br4              | Pb1  | Br1              | 101.62(3) | C16               | C17  | C18               | 109.6(6)  |
| Br4              | Pb1  | Br2              | 101.62(3) | C19               | N3   | C19 <sup>2</sup>  | 92.7(10)  |
| Br4              | Pb1  | Br3              | 97.04(3)  | C22 <sup>2</sup>  | N3   | C19 <sup>2</sup>  | 103.0(9)  |
| C1               | N1   | C7               | 107.7(6)  | C22               | N3   | C19               | 103.0(9)  |
| C4               | N1   | C1               | 112.7(6)  | C22 <sup>2</sup>  | N3   | C19               | 108.4(8)  |
| C4               | N1   | C7               | 107.6(6)  | C22               | N3   | C19 <sup>2</sup>  | 108.4(8)  |
| C4               | N1   | C10              | 110.4(5)  | C22 <sup>2</sup>  | N3   | C22               | 133.9(13) |
| C10              | N1   | C1               | 106.9(5)  | C22 <sup>2</sup>  | N3   | C22A <sup>2</sup> | 32.3(5)   |
| Br3              | Pb1  | Br1              | 119.28(3) | C13               | C14  | C15               | 109.9(6)  |
| C10              | N1   | C7               | 111.5(6)  | C22               | N3   | C22A <sup>2</sup> | 106.5(9)  |
| C4A              | N1   | C1A              | 109.4(15) | C19A <sup>2</sup> | N3   | C19A              | 133.2(16) |
| C4A              | N1   | C10A             | 103.4(14) | C19A <sup>2</sup> | N3   | C22A              | 113.9(8)  |
| C7A              | N1   | C4A              | 111.1(15) | C19A              | N3   | C22A              | 99.6(10)  |
| C7A              | N1   | C1A              | 114.2(16) | C22A <sup>2</sup> | N3   | C22A              | 88.1(10)  |
| C7A              | N1   | C10A             | 113.3(16) | C20               | C19  | N3                | 118.1(11) |
| C10A             | N1   | C1A              | 104.7(14) | C19               | C20  | C21               | 99.3(9)   |
| N1               | C1   | C2               | 114.3(8)  | N3                | C22  | C23               | 117.0(10) |
| C3               | C2   | C1               | 110.1(9)  | C24               | C23  | C22               | 109.2(9)  |
| N1               | C4   | C5               | 116.0(6)  | N1                | C4A  | C5A               | 116.7(13) |
| C10              | N1   | C7               | 111.5(6)  | C22               | N3   | C22A <sup>2</sup> | 106.5(9)  |
| C4A              | N1   | C1A              | 109.4(15) | C19A <sup>2</sup> | N3   | C19A              | 133.2(16) |
| C4               | C5   | C6               | 107.7(6)  | C6                | C5A  | C4A               | 105.2(10) |
| C8               | C7   | N1               | 116.5(8)  | C2A               | C1A  | N1                | 112(2)    |
| C7               | C8   | C9               | 108.2(8)  | C1A               | C2A  | C3                | 114(2)    |
| C11              | C10  | N1               | 116.6(7)  | N1                | C7A  | C8A               | 115(2)    |
| C10              | C11  | C12              | 109.5(8)  | C7A               | C8A  | C9                | 104(2)    |
| C13              | N2   | C13 <sup>1</sup> | 107.0(6)  | N1                | C10A | C11A              | 111.0(16) |
| C16              | N2   | C13              | 111.0(3)  | C12               | C11A | C10A              | 108.5(16) |
| C16              | N2   | C13 <sup>1</sup> | 110.8(3)  | N3                | C19A | C20A              | 119.8(12) |
| C16 <sup>1</sup> | N2   | C13 <sup>1</sup> | 111.0(3)  | C19A              | C20A | C21               | 111.2(11) |
| C16 <sup>1</sup> | N2   | C13              | 110.8(3)  | C22A              | C23A | C24               | 102.7(8)  |
| C16              | N2   | C16 <sup>1</sup> | 106.3(6)  | C23A              | C22A | N3                | 115.5(11) |
| C4               | C5   | C6               | 107.7(6)  | C6                | C5A  | C4A               | 105.2(10) |
| C8               | C7   | N1               | 116.5(8)  | C2A               | C1A  | N1                | 112(2)    |

**Table S4.** Summary of emission peak, excitation peak , Stokes shift, FWHM, and PLQY of the

low- dimensional metal halide with blue emission.

|                                                                                                      | PL<br>(nm) | PLE<br>(nm) | Stokes shift<br>(nm) t | FWHM<br>(nm) | PLQY    | Reference |
|------------------------------------------------------------------------------------------------------|------------|-------------|------------------------|--------------|---------|-----------|
| [BAPrEDA]PbCl <sub>6</sub> ·(H <sub>2</sub> O) <sub>2</sub>                                          | 392 nm     | 300 nm      | 92 nm                  | 73 nm        | 21.3%   | [1]       |
| (C <sub>13</sub> H <sub>19</sub> N <sub>4</sub> ) <sub>2</sub> PbBr <sub>4</sub>                     | 460 nm     | 350 nm      | 110 nm                 | 66 nm        | ~40%    | [2]       |
| (C <sub>9</sub> NH <sub>20</sub> ) <sub>7</sub> (PbCl <sub>4</sub> )Pb <sub>3</sub> Cl <sub>11</sub> | 470 nm     | 348nm       | 112nm                  | 84nm         | 83%     | [3]       |
| (C <sub>6</sub> N <sub>2</sub> H <sub>16</sub> Cl) <sub>2</sub> SnCl <sub>6</sub>                    | 450nm      | 375nm       | 75nm                   | 125nm        | 8.1 %   | [4]       |
| Cs <sub>3</sub> Cu <sub>2</sub> I <sub>5</sub>                                                       | 445nm      | 290nm       | 155nm                  | 110 nm       | 62.1%   | [5]       |
| Sb <sup>3+</sup> -Doped Cs <sub>2</sub> NaInCl <sub>6</sub>                                          | 442nm      | 338nm       | 104nm                  | 66nm         | 75.89%  | [6]       |
| (C <sub>5</sub> H <sub>7</sub> N <sub>2</sub> ) <sub>2</sub> ZnBr <sub>4</sub>                       | 438nm      | 320nm       | 118nm                  | -            | 19.18%  | [7]       |
| [(NH <sub>4</sub> ) <sub>2</sub> ]CuPbBr <sub>5</sub>                                                | 441nm      | 288nm       | 153nm                  | 107nm        | 32%     | [8]       |
| [BAPrEDA]PbCl <sub>6</sub>                                                                           | 390nm      | 300nm       | 90nm                   | 73nm         | 21.3%   | [1]       |
| Bi <sup>3+</sup> Doped Cs <sub>2</sub> HfCl <sub>6</sub>                                             | 461nm      | 359nm       | 102nm                  | 64nm         | 69.08%. | [9]       |
| Bi <sup>3+</sup> doped Cs <sub>2</sub> SnCl <sub>6</sub>                                             | 455nm      | 360nm       | 95nm                   | 66nm         | 78.9%   | [10]      |
| Cs <sub>2</sub> AgSbCl <sub>6</sub>                                                                  | 409nm      | 325nm       | 84nm                   | -            | 31,33%  | [11]      |
| Cs <sub>3</sub> Bi <sub>2</sub> Br <sub>9</sub>                                                      | 410nm      | 330nm       | 80nm                   | 48nm         | 19.4%   | [12]      |
| FA <sub>3</sub> Bi <sub>2</sub> Br <sub>9</sub>                                                      | 437nm      | 350nm       | 87nm                   | 65nm         | 52%     | [13]      |
| MA <sub>3</sub> Bi <sub>2</sub> Br <sub>9</sub>                                                      | 423nm      | 356nm       | 67nm                   | 62nm         | 12%     | [14]      |
| (TPA) <sub>2</sub> PbBr <sub>4</sub>                                                                 | 437nm      | 385nm       | 52m                    | 50nm         | 12%     | This work |

**Table S5.** Simulation table of bond angles of ground state and excited state.

|                  | Br5-Pb1-Br1 | Br5-Pb1-Br13 | Br5-Pb1-Br9 | Br13-Pb1-Br1 | Br13-Pb1-Br9 | Br1-Pb1-Br9 |
|------------------|-------------|--------------|-------------|--------------|--------------|-------------|
| ground-state     | 120.2419    | 103.6467     | 107.7008    | 99.5845      | 93.4944      | 124.9456    |
| excited-state    | 121.1687    | 107.5212     | 104.7389    | 100.3904     | 91.0455      | 125.6806    |
| distortion value | -0.9268     | -3.8745      | 2.9619      | -0.8059      | 2.4489       | -0.735      |

**Table S6.** Simulation table of bond lengths of ground state and excited state.

|                  | Pb1-Br1 | Pb1-Br5  | Pb1-Br13 | Pb1-Br9  |
|------------------|---------|----------|----------|----------|
| ground-state     | 3.01096 | 2.95914  | 2.78908  | 2.89284  |
| excited-state    | 2.97842 | 2.9736   | 2.81145  | 2.91726  |
| distortion value | 0.03254 | -0.01446 | -0.02237 | -0.02442 |

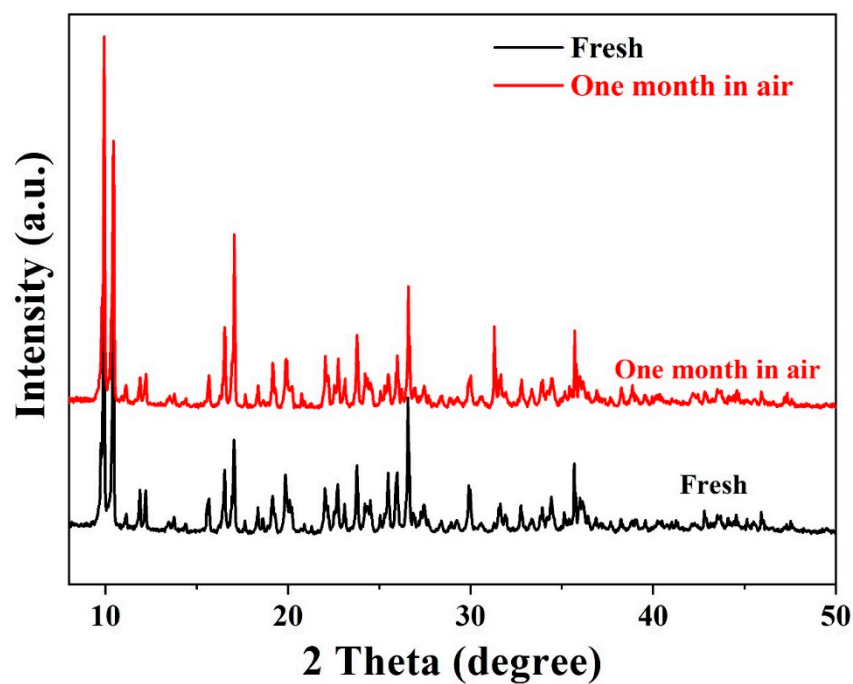

Figure S1. PXRD pattern result of  $(\text{TPA})_2\text{PbBr}_4$  powders after one month.

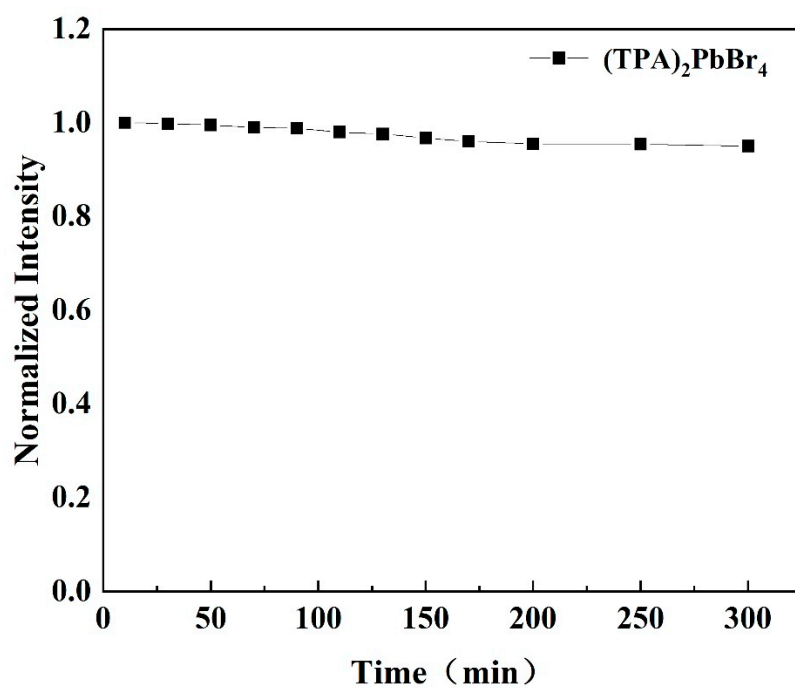

Figure S2. Photostability of  $(\text{TPA})_2\text{PbBr}_4$  powders under continuous illumination using a high power mercury lamp .

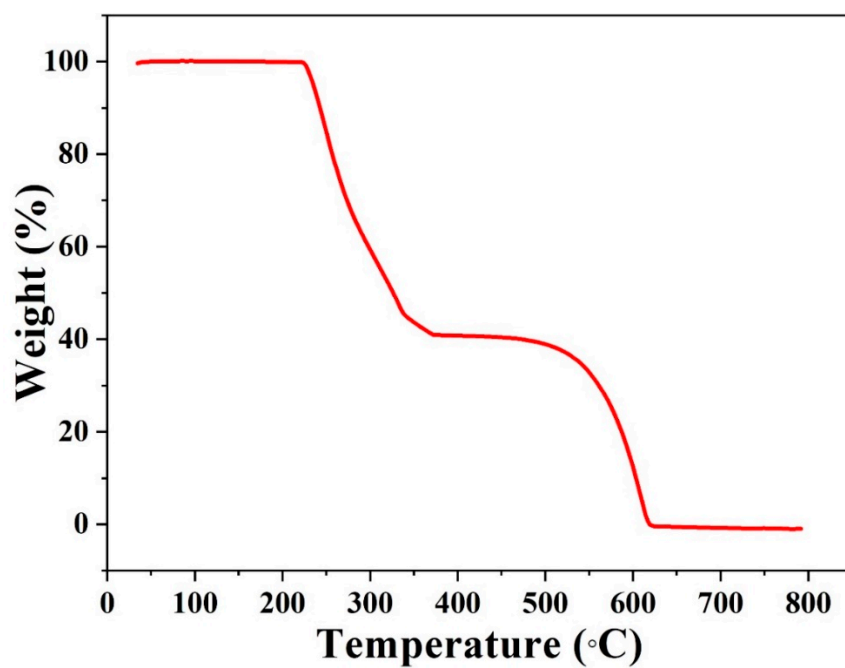

**Figure S3.** TG curve of  $(\text{TPA})_2\text{PbBr}_4$  powders.

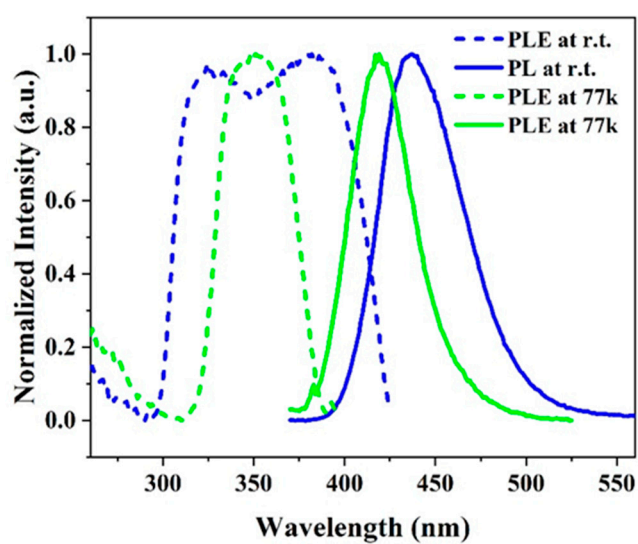

**Figure S4.** PL and PLE spectra at RT and 77 K of  $(\text{TPA})_2\text{PbBr}_4$  SCs crystals.

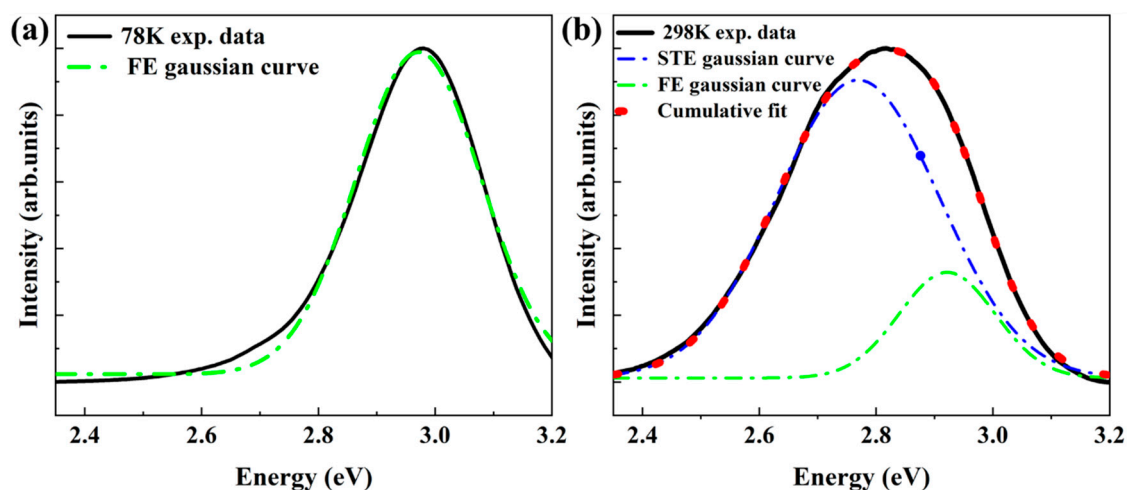

**Figure S5.** The PL spectra of (TPA)<sub>2</sub>PbBr<sub>4</sub> SCs at (a) 78 and (b) 298 K were fitted by Gaussian curves.

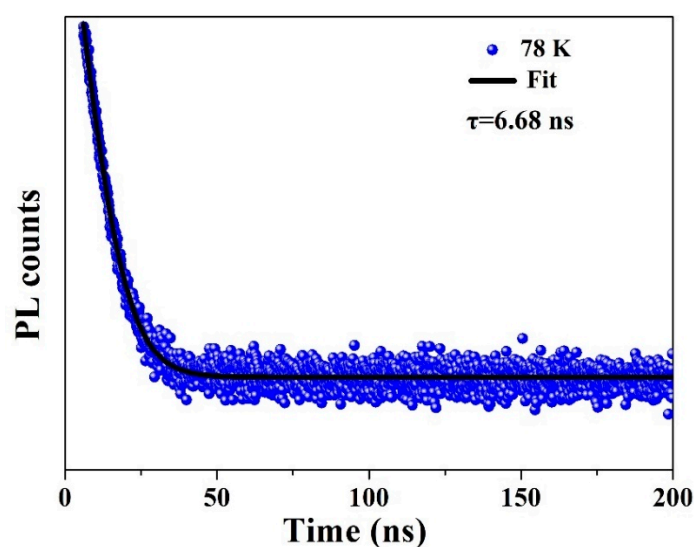

**Figure S6.** The decay lifetime curves of (TPA)<sub>2</sub>PbBr<sub>4</sub> SCs at 98 K.

## REFERENCES

- (1) Sun, C.; Jiang, K.; Han, M.-F.; Liu, M.-J.; Lian, X.-K.; Jiang, Y.-X.; Shi, H.-S.; Yue, C.-Y.; Lei, X. A Zero-Dimensional Hybrid Lead Perovskite with Highly Efficient Blue-Violet Light Emission. *J. Mater. Chem. C* **2020**, *8*, 11890–11895.
- (2) Lin, H.; Zhou, C.; Chaaban, M.; Xu, L.-J.; Zhou, Y.; Neu, J.; Worku, M.; Berkwits, E.; He, Q.; Lee, S.; Lin, X.; Siegrist, T.; Du, M.-H.; Ma, B. Bulk Assembly of Zero-Dimensional Organic Lead Bromide Hybrid with Efficient Blue Emission. *ACS Materials Lett.* **2019**, *1*, 594–598.
- (3) Zhou, C. K.; Lin, H. R.; Worku, M.; Neu, J.; Zhou, Y.; Tian, Y.; Lee, S. J.; Djurovich, P.; Siegrist, T.; Ma, B. W. Blue Emitting Single Crystalline Assembly of Metal Halide Clusters. *J. Am. Chem. Soc.* **2018**, *140*, 13181–13184.



- (4) S Song, G.; Li, M.; Yang, Y.; Liang, F.; Huang, Q.; Liu, X.; Gong, P.; Xia, Z.; Lin, Z. Lead-Free Tin(IV)-Based Organic-Inorganic Metal Halide Hybrids with Excellent Stability and Blue-Broadband Emission. *J. Phys. Chem. Lett.* **2020**, *11*, 1808–1813.
- (5) Jun, T.; Sim, K.; Iimura, S.; Sasase, M.; Kamioka, H. Lead-Free Highly Efficient Blue-Emitting Cs<sub>3</sub>Cu<sub>2</sub>I<sub>5</sub> with 0D Electronic Structure. *Adv. Mater.* **2018**, *30*, 1804547.
- (6) Zeng, R.; Zhang, L.; Xue, Y.; Ke, B.; Zhao, Z.; Huang, D.; Wei, Q.; Zhou, W.; Zou, B. Highly Efficient Blue Emission from Self-Trapped Excitons in Stable Sb<sup>3+</sup>-Doped Cs<sub>2</sub>NaInCl<sub>6</sub> Double Perovskites. *J. Phys. Chem. Lett.* **2020**, *11*, 2053–2061.
- (7) Yangui, A.; Rocanova, R.; McWhorter, T. M.; Wu, Y.; Du, M.-H.; Saparov, B. Hybrid Organic-Inorganic Halides (C<sub>5</sub>H<sub>7</sub>N<sub>2</sub>)<sub>2</sub>MBr<sub>4</sub> (M = Hg, Zn) with High Color Rendering Index and High-Efficiency White-Light Emission. *Chem. Mater.* **2019**, *31*, 2983–2991.
- (8) Sun, C.; Guo, Y.-H.; Han, S.-S.; Li, J.-Z.; Jiang, K.; Dong, L.-F.; Liu, Q.-L.; Yue, C.-Y.; Lei, X.-W. Three-Dimensional Cuprous Lead Bromide Framework with Highly Efficient and Stable Blue Photo-luminescence Emission. *Angew. Chem., Int. Ed.* **2020**, *59*, 16465–16469.
- (9) Liu, R.; Zhang, W.; Liu, W.; Li, G. Synthesis of a Bi<sup>3+</sup>-Doped Cs<sub>2</sub>HfCl<sub>6</sub> Double Perovskite with Highly Efficient Blue Light Emission at Room Temperature. *Inorg. Chem.* **2021**, *60*, 10451–10458.
- (10) Tan, Z.; Li, J.; Zhang, C.; Li, Z.; Hu, Q.; Xiao, Z.; Kamiya, T.; Hosono, H.; Niu, G.; Lifshitz, E.; Cheng, Y.; Tang, J. Highly Efficient Blue-Emitting Bi-Doped Cs<sub>2</sub>SnCl<sub>6</sub> Perovskite Variant: Photoluminescence Induced by Impurity Doping. *Adv. Funct. Mater.* **2018**, *28*, 1801131.
- (11) Lv, K.; Qi, S.; Liu, G.; Lou, Y.; Chen, J.; Zhao, Y. Lead-free silver-antimony halide double perovskite quantum dots with superior blue photoluminescence. *Chem. Commun.* **2019**, *55*, 14741–14744.
- (12) Leng, M.; Yang, Y.; Zeng, K.; Chen, Z.; Tan, Z.; Li, S.; Li, J.; Xu, B.; Li, D.; Hautzinger, M. P.; Fu, Y.; Zhai, T.; Xu, L.; Niu, G.; Jin, S.; Tang, J. All-Inorganic Bismuth-Based Perovskite Quantum Dots with Bright Blue Photoluminescence and Excellent Stability. *Adv. Funct. Mater.* **2018**, *28*, 1704446.
- (13) Shen, Y.; Yin, J.; Cai, B.; Wang, Z.; Dong, Y.; Xu, X.; Zeng, H. Lead-free, stable, high-efficiency (52%) blue luminescent FA<sub>3</sub>Bi<sub>2</sub>Br<sub>9</sub> perovskite quantum dots. *Nanoscale Horiz.*

**2020**, 5, 580–585.

(14) Leng, M.; Chen, Z.; Yang, Y.; Li, Z.; Zeng, K.; Li, K.; Niu, G.; He, Y.; Zhou, Q.; Tang, J.

Lead-Free, Blue Emitting Bismuth Halide Perovskite Quantum Dots. *Angew. Chem. Int. Ed.*

**2016**, 55, 15012–15016.
